# Supplementary material for: Existence of noble gas-inserted phosphorus fluorides: FNgPF2and FNgPF4with Ng–P covalent bond (Ng = Ar, Kr, Xe and Rn)
Source: Royal Society of Chemistry journal article supplement (doi:10.1039/d2cp02329f), 2022-01-01
Supplement: d2cp02329f1.pdf [file d2cp02329f1.pdf]

## **Electronic Supplementary Information**

### **Existence of Noble Gas Inserted Phosphorus Fluorides: FNgPF<sub>2</sub> and FNgPF<sub>4</sub> with Ng–P Covalent Bond ( Ng = Ar, Kr, Xe and Rn)**

**Subrahmanya Prasad Kuntar<sup>§,‡</sup>, Ayan Ghosh<sup>†,‡</sup>, and Tapan K. Ghanty<sup>§,‡,\*</sup>**

*<sup>§</sup>Bio Science Group, Bhabha Atomic Research Centre, Mumbai 400 085, INDIA.*

*<sup>†</sup>Laser and Plasma Technology Division, Beam Technology Development Group,  
Bhabha Atomic Research Centre, Mumbai 400 085, INDIA.*

*<sup>‡</sup>Homi Bhabha National Institute, Training School Complex, Anushakti Nagar,  
Mumbai 400 094, INDIA.*

### List of Figures:

**Figure S1.** The plots of deformation density ( $\Delta\rho(r)$ ) for FXePF<sub>2</sub> and FXePF<sub>4</sub> molecules considering FXe as one fragment and PF<sub>2</sub> or PF<sub>4</sub> as another fragment at the B3LYP-D3/TZ2P level of theory; in FNgPF<sub>2</sub> molecules,  $\Delta\rho_{1\alpha}(r)$  and  $\Delta\rho_{1\beta}(r)$  correspond to (FNg  $\leftarrow$  PF<sub>n</sub>)  $\sigma$ -donation and (FNg  $\rightarrow$  PF<sub>n</sub>)  $\sigma$ -back donation, respectively;  $\Delta\rho_{2\alpha}(r)$ ,  $\Delta\rho_{3\alpha}(r)$ ,  $\Delta\rho_{2\beta}(r)$ , and  $\Delta\rho_{3\beta}(r)$  refer to the (FNg  $\rightarrow$  PF<sub>n</sub>)  $\pi$ -back donations;  $\Delta\rho_{4\alpha}(r)$  and  $\Delta\rho_{4\beta}(r)$  refers to (FNg  $\rightarrow$  PF<sub>n</sub>)  $\sigma$ -back donation. In FNgPF<sub>4</sub> systems,  $\Delta\rho_{1\alpha}(r)$  and  $\Delta\rho_{1\beta}(r)$  correspond to (FNg  $\leftarrow$  PF<sub>n</sub>)  $\sigma$ -donation and (FNg  $\rightarrow$  PF<sub>n</sub>)  $\sigma$ -back donation, respectively;  $\Delta\rho_{2\alpha}(r)$  represents (FNg  $\rightarrow$  PF<sub>n</sub>)  $\sigma$ -back donation;  $\Delta\rho_{3\alpha}(r)$ ,  $\Delta\rho_{4\alpha}(r)$ ,  $\Delta\rho_{2\beta}(r)$ , and  $\Delta\rho_{3\beta}(r)$  correspond to the (FNg  $\rightarrow$  PF<sub>n</sub>)  $\pi$ -back donations. The energy of associated orbital terms is provided in kcal mol<sup>-1</sup>. (An isovalue of 0.001 is used.)

**Figure S2.** The plots of deformation density ( $\Delta\rho(r)$ ) for FXePF<sub>2</sub> and FXePF<sub>4</sub> molecules considering FXe<sup>-</sup> as one fragment and PF<sub>2</sub><sup>+</sup> or PF<sub>4</sub><sup>+</sup> as another fragment at the B3LYP-D3/TZ2P level of theory, where the deformation density,  $\Delta\rho_1(r)$  corresponds to the (FNg<sup>-</sup>  $\rightarrow$  PF<sub>n</sub><sup>+</sup>)  $\sigma$ -donation;  $\Delta\rho_2(r)$  and  $\Delta\rho_3(r)$  refer to (FNg<sup>-</sup>  $\rightarrow$  PF<sub>n</sub><sup>+</sup>)  $\pi$ -donation;  $\Delta\rho_4(r)$  represents the (FNg<sup>-</sup>  $\leftarrow$  PF<sub>n</sub><sup>+</sup>)  $\sigma$ -back donation;  $\Delta\rho_5(r)$  corresponds to (FNg<sup>-</sup>  $\leftarrow$  PF<sub>n</sub><sup>+</sup>)  $\pi$ -back donation; all other  $\Delta\rho_i(r)$  ( $i > 5$ ) contributes negligibly. The energy of associated orbital terms is provided in kcal mol<sup>-1</sup>. (An isovalue of 0.001 is used.)

**Figure S3.** The plots of deformation density ( $\Delta\rho(r)$ ) for FXePF<sub>2</sub> and FXePF<sub>4</sub> molecules considering FXe<sup>+</sup> as one fragment and PF<sub>2</sub><sup>-</sup> or PF<sub>4</sub><sup>-</sup> as another fragment at the B3LYP-D3/TZ2P level of theory, where the deformation density,  $\Delta\rho_1(r)$  corresponds to the (FNg<sup>+</sup>  $\leftarrow$  PF<sub>n</sub><sup>-</sup>)  $\sigma$ -donation;  $\Delta\rho_2(r)$  and  $\Delta\rho_3(r)$  refer to (FNg<sup>+</sup>  $\rightarrow$  PF<sub>n</sub><sup>-</sup>)  $\pi$ -back donations;  $\Delta\rho_4(r)$  represents the  $\sigma$ -back donation (FNg<sup>+</sup>  $\rightarrow$  PF<sub>n</sub><sup>-</sup>);  $\Delta\rho_5(r)$  corresponds to (FNg<sup>+</sup>  $\rightarrow$  PF<sub>n</sub><sup>-</sup>)  $\pi$ -back donation; all other  $\Delta\rho_i(r)$  ( $i > 5$ ) contributes negligibly. The energy of associated orbital terms is provided in kcal mol<sup>-1</sup>. (An isovalue of 0.001 is used.)

**List of Tables:**

**Table S1.** Calculated F–Ng, Ng–P Bond Length (R in Å) and F–Ng–P Bond Angles ( $\theta$  in Degree) Values in FNgPF<sub>2</sub> and FNgPF<sub>4</sub> (Ng = Ar, Kr, Xe, and Rn) Molecules using B3LYP and MP2 Methods with the DEF2 Basis Set and CCSD(T) Method with AVTZ Basis Set.

**Table S2.** Calculated Values of the Mullikan Charges of Constituent Atoms in FNgPF<sub>2</sub> and FNgPF<sub>4</sub> (Ng = Ar, Kr, Xe and Rn) Molecules Using the B3LYP and MP2 Methods with DEF2 Basis Set.

**Table S3.** EDA-NOCV Results of FNgPF<sub>2</sub> and FNgPF<sub>4</sub> (Ng = Ar, Kr, Xe, and Rn) Molecules Considering F<sup>−</sup> as One Fragment and NgPF<sub>2</sub><sup>+</sup> or NgPF<sub>4</sub><sup>+</sup> as Another Fragment at the B3LYP-D3/TZ2P Level of Theory. All Energy Terms are Expressed in kcal mol<sup>−1</sup>.

**Table S4.** EDA-NOCV Results of FNgPF<sub>2</sub> and FNgPF<sub>4</sub> (Ng = Ar, Kr, Xe, and Rn) Molecules Considering FNg as One Fragment and PF<sub>2</sub> or PF<sub>4</sub> as Another Fragment at the B3LYP-D3/TZ2P Level of Theory. All Energy Terms are Expressed in kcal mol<sup>−1</sup>.

**Table S5.** EDA-NOCV Results of FNgPF<sub>2</sub> and FNgPF<sub>4</sub> (Ng = Ar, Kr, Xe, and Rn) Molecules Considering FNg<sup>−</sup> as One Fragment and PF<sub>2</sub><sup>+</sup> or PF<sub>4</sub><sup>+</sup> as Another Fragment at the B3LYP-D3/TZ2P Level of Theory. All Energy Terms are Expressed in kcal mol<sup>−1</sup>.

**Table S6.** EDA-NOCV Results of FNgPF<sub>2</sub> and FNgPF<sub>4</sub> (Ng = Ar, Kr, Xe, and Rn) Molecules Considering FNg<sup>+</sup> as One Fragment and PF<sub>2</sub><sup>−</sup> or PF<sub>4</sub><sup>−</sup> as Another Fragment at the B3LYP-D3/TZ2P Level of Theory. All Energy Terms are Expressed in kcal mol<sup>−1</sup>.

**Figure S1.** The plots of deformation density ( $\Delta\rho(r)$ ) for FXePF<sub>2</sub> and FXePF<sub>4</sub> molecules considering FXe as one fragment and PF<sub>2</sub> or PF<sub>4</sub> as another fragment at the B3LYP-D3/TZ2P level of theory; in FNgPF<sub>2</sub> molecules,  $\Delta\rho_{1\alpha}(r)$  and  $\Delta\rho_{1\beta}(r)$  correspond to (FNg  $\leftarrow$  PF<sub>n</sub>)  $\sigma$ -donation and (FNg  $\rightarrow$  PF<sub>n</sub>)  $\sigma$ -back donation, respectively;  $\Delta\rho_{2\alpha}(r)$ ,  $\Delta\rho_{3\alpha}(r)$ ,  $\Delta\rho_{2\beta}(r)$ , and  $\Delta\rho_{3\beta}(r)$  refer to the (FNg  $\rightarrow$  PF<sub>n</sub>)  $\pi$ -back donations;  $\Delta\rho_{4\alpha}(r)$  and  $\Delta\rho_{4\beta}(r)$  refers to (FNg  $\rightarrow$  PF<sub>n</sub>)  $\sigma$ -back donation. In FNgPF<sub>4</sub> systems,  $\Delta\rho_{1\alpha}(r)$  and  $\Delta\rho_{1\beta}(r)$  correspond to (FNg  $\leftarrow$  PF<sub>n</sub>)  $\sigma$ -donation and (FNg  $\rightarrow$  PF<sub>n</sub>)  $\sigma$ -back donation, respectively;  $\Delta\rho_{2\alpha}(r)$  represents (FNg  $\rightarrow$  PF<sub>n</sub>)  $\sigma$ -back donation;  $\Delta\rho_{3\alpha}(r)$ ,  $\Delta\rho_{4\alpha}(r)$ ,  $\Delta\rho_{2\beta}(r)$ , and  $\Delta\rho_{3\beta}(r)$  correspond to the (FNg  $\rightarrow$  PF<sub>n</sub>)  $\pi$ -back donations. The energy of associated orbital terms is provided in kcal mol<sup>-1</sup>. (An isovalue of 0.001 is used.)

### FXePF<sub>2</sub> (FXe + PF<sub>2</sub>)

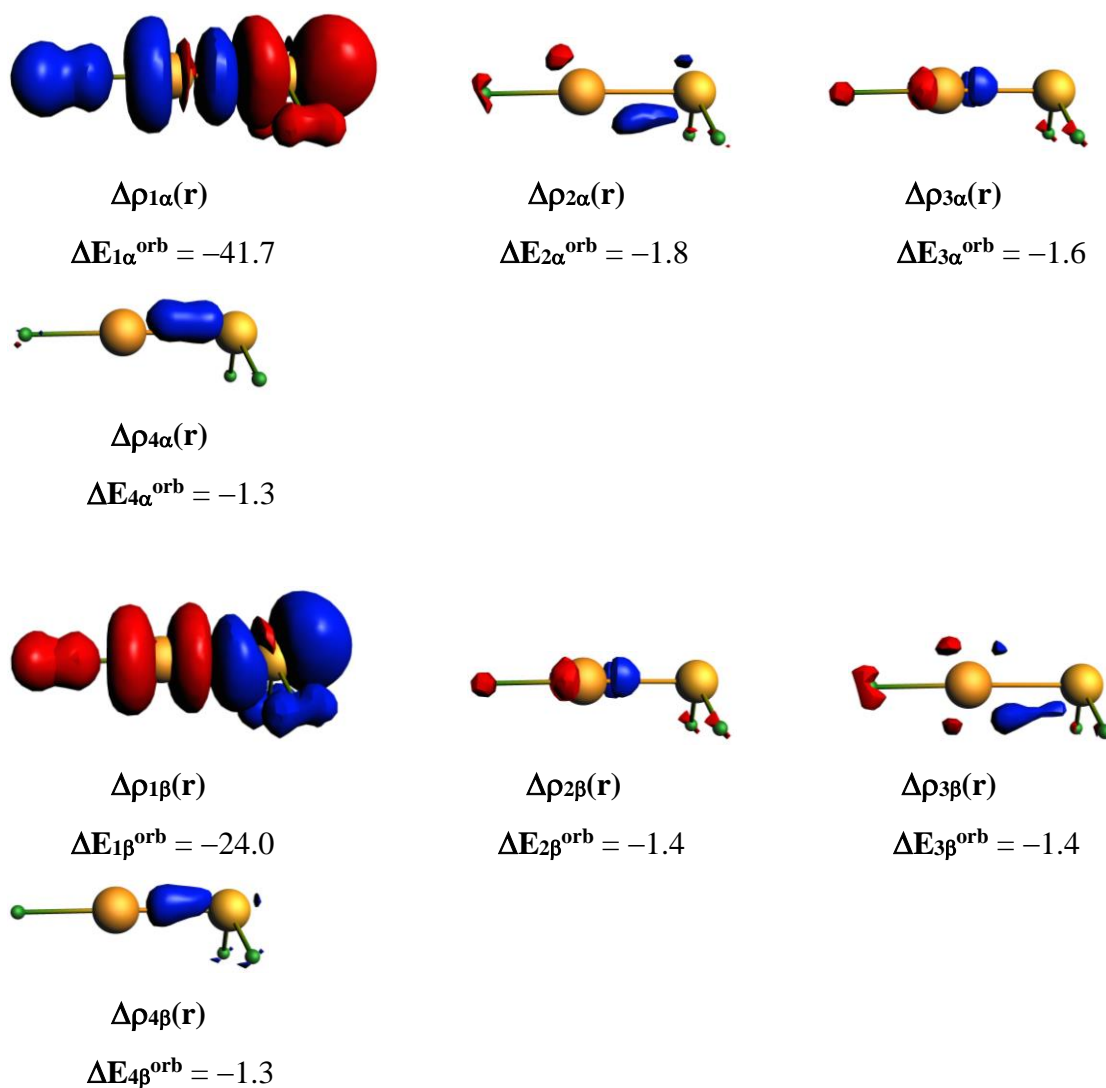

**FXePF<sub>4</sub> (FXe + PF<sub>4</sub>)**

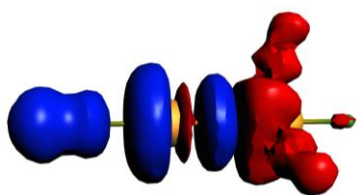

$$\Delta\rho_{1\alpha}(\mathbf{r})$$

$$\Delta E_{1\alpha}^{\text{orb}} = -40.1$$

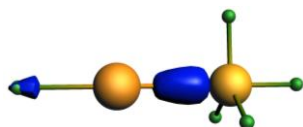

$$\Delta\rho_{2\alpha}(\mathbf{r})$$

$$\Delta E_{2\alpha}^{\text{orb}} = -1.6$$

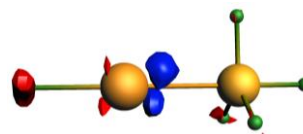

$$\Delta\rho_{3\alpha}(\mathbf{r})$$

$$\Delta E_{3\alpha}^{\text{orb}} = -1.2$$

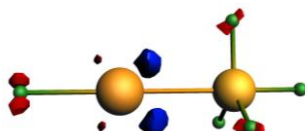

$$\Delta\rho_{4\alpha}(\mathbf{r})$$

$$\Delta E_{4\alpha}^{\text{orb}} = -1.2$$

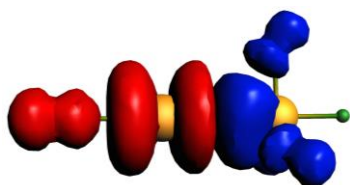

$$\Delta\rho_{1\beta}(\mathbf{r})$$

$$\Delta E_{1\beta}^{\text{orb}} = -28.9$$

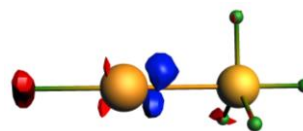

$$\Delta\rho_{2\beta}(\mathbf{r})$$

$$\Delta E_{2\beta}^{\text{orb}} = -1.1$$

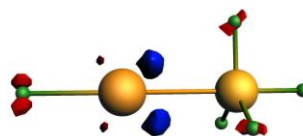

$$\Delta\rho_{3\beta}(\mathbf{r})$$

$$\Delta E_{3\beta}^{\text{orb}} = -1.1$$

**Figure S2.** The plots of deformation density ( $\Delta\rho(r)$ ) for FXePF<sub>2</sub> and FXePF<sub>4</sub> molecules considering FXe<sup>−</sup> as one fragment and PF<sub>2</sub><sup>+</sup> or PF<sub>4</sub><sup>+</sup> as another fragment at the B3LYP-D3/TZ2P level of theory, where the deformation density,  $\Delta\rho_1(r)$  corresponds to the (FNg<sup>−</sup> → PF<sub>n</sub><sup>+</sup>)  $\sigma$ -donation;  $\Delta\rho_2(r)$  and  $\Delta\rho_3(r)$  refer to (FNg<sup>−</sup> → PF<sub>n</sub><sup>+</sup>)  $\pi$ -donation;  $\Delta\rho_4(r)$  represents the (FNg<sup>−</sup> ← PF<sub>n</sub><sup>+</sup>)  $\sigma$ -back donation;  $\Delta\rho_5(r)$  corresponds to (FNg<sup>−</sup> ← PF<sub>n</sub><sup>+</sup>)  $\pi$ -back donation; all other  $\Delta\rho_i(r)$  ( $i > 5$ ) contributes negligibly. The energy of associated orbital terms is provided in kcal mol<sup>−1</sup>. (An isovalue of 0.001 is used.)

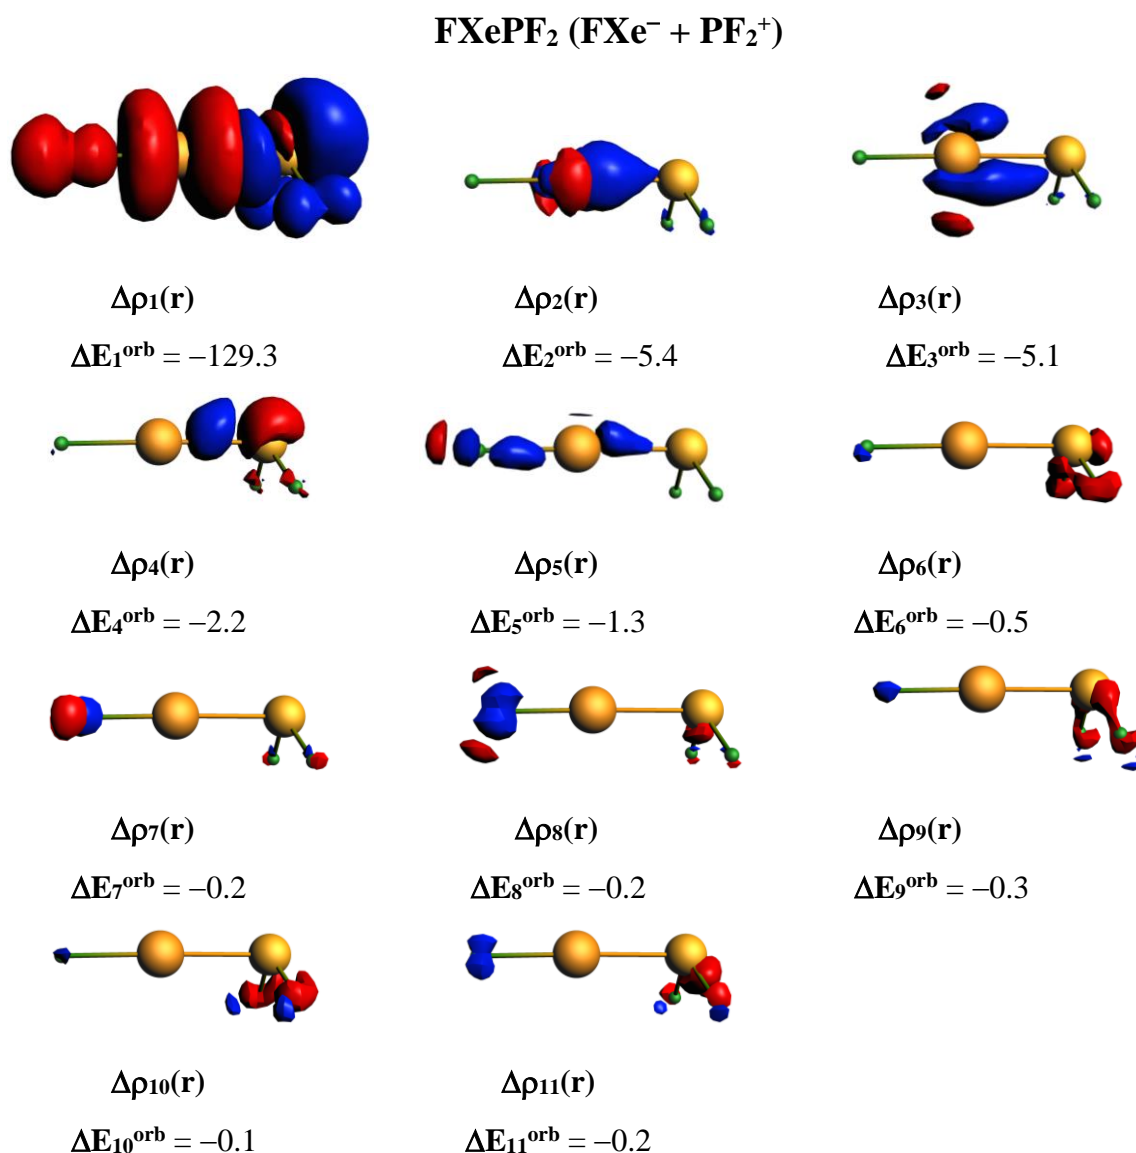

**FXePF<sub>4</sub> (FXe<sup>-</sup> + PF<sub>4</sub><sup>+</sup>)**

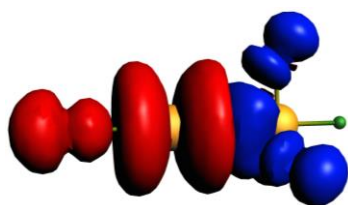

$\Delta\rho_1(\mathbf{r})$   
 $\Delta E_1^{\text{orb}} = -137.5$

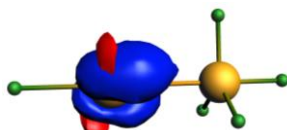

$\Delta\rho_2(\mathbf{r})$   
 $\Delta E_2^{\text{orb}} = -4.2$

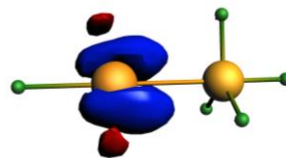

$\Delta\rho_3(\mathbf{r})$   
 $\Delta E_3^{\text{orb}} = -4.2$

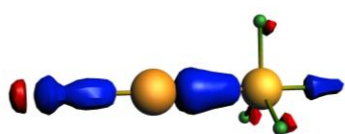

$\Delta\rho_4(\mathbf{r})$   
 $\Delta E_4^{\text{orb}} = -2.4$

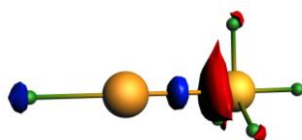

$\Delta\rho_5(\mathbf{r})$   
 $\Delta E_5^{\text{orb}} = -1.4$

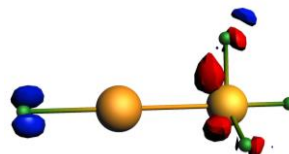

$\Delta\rho_6(\mathbf{r})$   
 $\Delta E_6^{\text{orb}} = -0.3$

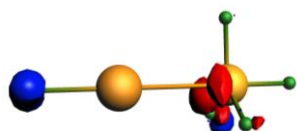

$\Delta\rho_7(\mathbf{r})$   
 $\Delta E_7^{\text{orb}} = -0.3$

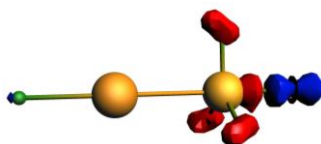

$\Delta\rho_8(\mathbf{r})$   
 $\Delta E_8^{\text{orb}} = -0.4$

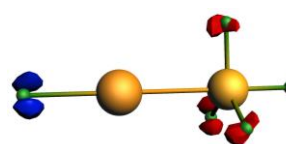

$\Delta\rho_9(\mathbf{r})$   
 $\Delta E_9^{\text{orb}} = -0.5$

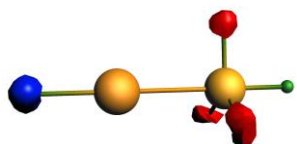

$\Delta\rho_{10}(\mathbf{r})$   
 $\Delta E_{10}^{\text{orb}} = -0.5$

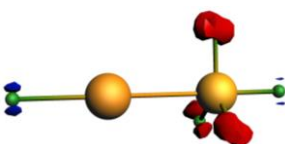

$\Delta\rho_{11}(\mathbf{r})$   
 $\Delta E_{11}^{\text{orb}} = -0.3$

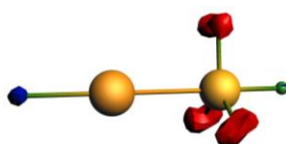

$\Delta\rho_{12}(\mathbf{r})$   
 $\Delta E_{12}^{\text{orb}} = -0.3$

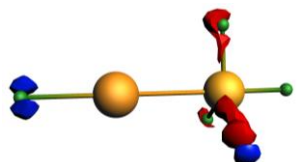

$\Delta\rho_{13}(\mathbf{r})$   
 $\Delta E_{13}^{\text{orb}} = -0.1$

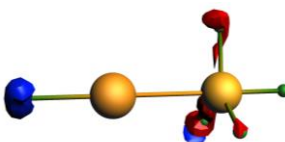

$\Delta\rho_{14}(\mathbf{r})$   
 $\Delta E_{14}^{\text{orb}} = -0.1$

**Figure S3.** The plots of deformation density ( $\Delta\rho(r)$ ) for FXePF<sub>2</sub> and FXePF<sub>4</sub> molecules considering FXe<sup>+</sup> as one fragment and PF<sub>2</sub><sup>−</sup> or PF<sub>4</sub><sup>−</sup> as another fragment at the B3LYP-D3/TZ2P level of theory, where the deformation density,  $\Delta\rho_1(r)$  corresponds to the (FNg<sup>+</sup> ← PF<sub>n</sub><sup>−</sup>)  $\sigma$ -donation;  $\Delta\rho_2(r)$  and  $\Delta\rho_3(r)$  refer to (FNg<sup>+</sup> → PF<sub>n</sub><sup>−</sup>)  $\pi$ -back donations;  $\Delta\rho_4(r)$  represents the  $\sigma$ -back donation (FNg<sup>+</sup> → PF<sub>n</sub><sup>−</sup>);  $\Delta\rho_5(r)$  corresponds to (FNg<sup>+</sup> → PF<sub>n</sub><sup>−</sup>)  $\pi$ -back donation; all other  $\Delta\rho_i(r)$  ( $i > 5$ ) contributes negligibly. The energy of associated orbital terms is provided in kcal mol<sup>−1</sup>. (An isovalue of 0.001 is used.)

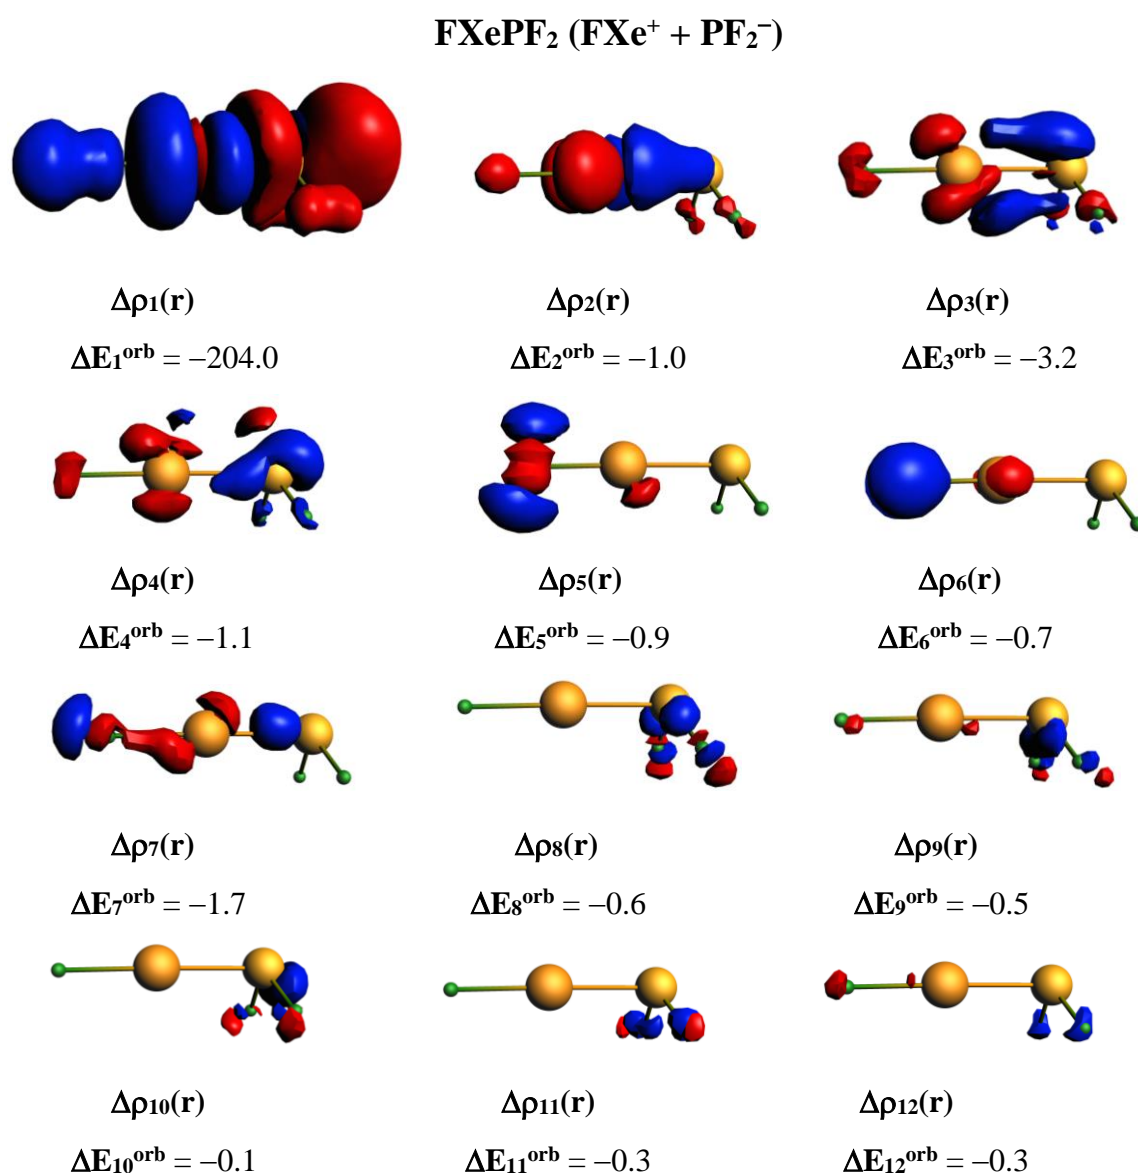

**FXePF<sub>4</sub> (FXe<sup>+</sup> + PF<sub>4</sub><sup>-</sup>)**

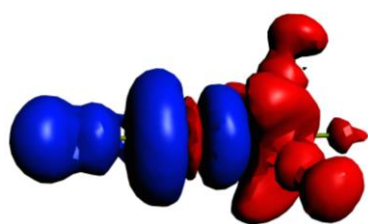

$$\Delta\rho_1(\mathbf{r})$$

$$\Delta E_1^{\text{orb}} = -197.7$$

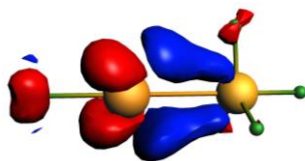

$$\Delta\rho_2(\mathbf{r})$$

$$\Delta E_2^{\text{orb}} = -1.2$$

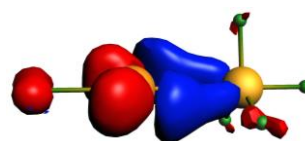

$$\Delta\rho_3(\mathbf{r})$$

$$\Delta E_3^{\text{orb}} = -1.2$$

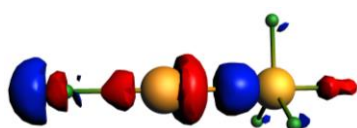

$$\Delta\rho_4(\mathbf{r})$$

$$\Delta E_4^{\text{orb}} = -2.6$$

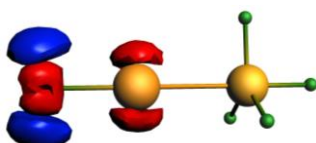

$$\Delta\rho_5(\mathbf{r})$$

$$\Delta E_5^{\text{orb}} = -0.7$$

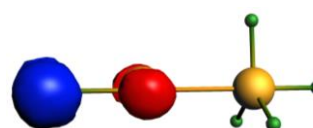

$$\Delta\rho_6(\mathbf{r})$$

$$\Delta E_6^{\text{orb}} = -0.7$$

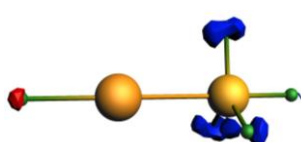

$$\Delta\rho_7(\mathbf{r})$$

$$\Delta E_7^{\text{orb}} = -0.7$$

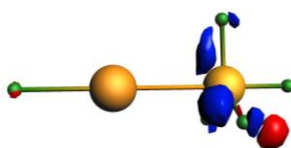

$$\Delta\rho_8(\mathbf{r})$$

$$\Delta E_8^{\text{orb}} = -1.0$$

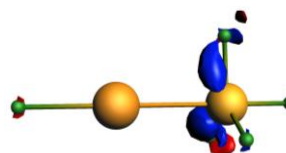

$$\Delta\rho_9(\mathbf{r})$$

$$\Delta E_9^{\text{orb}} = -1.0$$

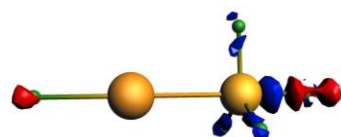

$$\Delta\rho_{10}(\mathbf{r})$$

$$\Delta E_{10}^{\text{orb}} = -0.6$$

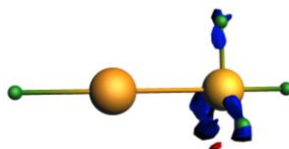

$$\Delta\rho_{11}(\mathbf{r})$$

$$\Delta E_{11}^{\text{orb}} = -0.5$$

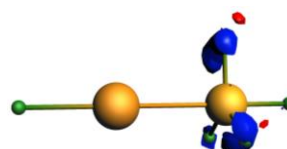

$$\Delta\rho_{12}(\mathbf{r})$$

$$\Delta E_{12}^{\text{orb}} = -0.5$$

**Table S1. Calculated F–Ng, Ng–P Bond Length (R in Å) and F–Ng–P Bond Angles ( $\theta$  in Degree) Values in FNgPF<sub>2</sub> and FNgPF<sub>4</sub> (Ng = Ar, Kr, Xe, and Rn) Molecules using B3LYP and MP2 Methods with the DEF2 Basis Set and CCSD(T) Method with AVTZ Basis Set.**

| Molecule                        | Parameters        | Method  | Ar    |                  | Kr    |                  | Xe    |                  | Rn    |                  |
|---------------------------------|-------------------|---------|-------|------------------|-------|------------------|-------|------------------|-------|------------------|
|                                 |                   |         | Min   | TS               | Min   | TS               | Min   | TS               | Min   | TS               |
| FNgPF <sub>2</sub>              | R(F–Ng)           | MP2     | 2.051 | 2.291            | 2.095 | 2.368            | 2.164 | 2.423            | 2.227 | 2.471            |
|                                 |                   | B3LYP   | 2.135 | 2.474            | 2.159 | 2.516            | 2.198 | 2.470            | 2.252 | 2.499            |
|                                 |                   | CCSD(T) | 2.178 | ... <sup>a</sup> | 2.112 | ... <sup>a</sup> | 2.162 | ... <sup>a</sup> | 2.226 | ... <sup>a</sup> |
|                                 | R(Ng–P)           | MP2     | 2.266 | 2.247            | 2.413 | 2.379            | 2.592 | 2.545            | 2.690 | 2.630            |
|                                 |                   | B3LYP   | 2.435 | 2.356            | 2.527 | 2.461            | 2.675 | 2.655            | 2.765 | 2.720            |
|                                 |                   | CCSD(T) | 2.203 | ... <sup>a</sup> | 2.479 | ... <sup>a</sup> | 2.626 | ... <sup>a</sup> | 2.725 | ... <sup>a</sup> |
|                                 | $\theta$ (F–Ng–P) | MP2     | 177.5 | 118.6            | 178.1 | 110.5            | 178.7 | 103.5            | 178.8 | 99.4             |
|                                 |                   | B3LYP   | 177.0 | 104.1            | 178.3 | 98.5             | 179.0 | 98.9             | 178.8 | 95.3             |
|                                 |                   | CCSD(T) | 178.9 | ... <sup>a</sup> | 177.2 | ... <sup>a</sup> | 178.4 | ... <sup>a</sup> | 178.5 | ... <sup>a</sup> |
| FNgPF <sub>4</sub> <sup>b</sup> | R(F–Ng)           | MP2     | 2.074 | 2.344            | 2.086 | 2.422            | 2.145 | 2.477            | 2.206 | 2.515            |
|                                 |                   | B3LYP   | 2.122 | 2.450            | 2.137 | 2.531            | 2.169 | 2.531            | 2.222 | 2.553            |
|                                 | R(Ng–P)           | MP2     | 2.255 | 2.436            | 2.402 | 2.557            | 2.588 | 2.675            | 2.688 | 2.740            |
|                                 |                   | B3LYP   | 2.403 | 2.697            | 2.500 | 2.807            | 2.657 | 2.800            | 2.749 | 2.845            |
|                                 | $\theta$ (F–Ng–P) | MP2     | 180.0 | 134.0            | 180.0 | 120.2            | 180.0 | 108.1            | 180.0 | 102.6            |
|                                 |                   | B3LYP   | 180.0 | 114.5            | 180.0 | 105.2            | 180.0 | 100.0            | 180.0 | 96.1             |

<sup>a</sup>It has not been possible to optimize the transition state of FNgPF<sub>2</sub> molecules by using CCSD(T)/AVTZ level of theory.

<sup>b</sup>It has not been possible to optimize the minima and the transition state geometry of FNgPF<sub>4</sub> molecules by employing CCSD(T) method with AVTZ basis set.

**Table S2. Calculated Values of the Mullikan Charges of Constituent Atoms in FNgPF<sub>2</sub> and FNgPF<sub>4</sub> (Ng = Ar, Kr, Xe and Rn) Molecules Using the B3LYP and MP2 Methods with DEF2 Basis Set.**

| FNgPF <sub>2</sub>   | Methods      | Ar     |        | Kr     |        | Xe     |        | Rn     |        |
|----------------------|--------------|--------|--------|--------|--------|--------|--------|--------|--------|
|                      |              | Min    | TS     | Min    | TS     | Min    | TS     | Min    | TS     |
| <b>F<sup>a</sup></b> | <b>MP2</b>   | −0.733 | −0.880 | −0.698 | −0.872 | −0.654 | −0.825 | −0.664 | −0.826 |
|                      | <b>B3LYP</b> | −0.651 | −0.623 | −0.666 | −0.681 | −0.634 | −0.744 | −0.640 | −0.754 |
| <b>Ng</b>            | <b>MP2</b>   | 0.390  | 0.308  | 0.590  | 0.406  | 0.624  | 0.499  | 0.679  | 0.549  |
|                      | <b>B3LYP</b> | 0.299  | 0.123  | 0.464  | 0.225  | 0.548  | 0.411  | 0.611  | 0.469  |
| <b>P</b>             | <b>MP2</b>   | 0.728  | 0.858  | 0.529  | 0.771  | 0.477  | 0.648  | 0.433  | 0.612  |
|                      | <b>B3LYP</b> | 0.698  | 0.738  | 0.582  | 0.699  | 0.505  | 0.616  | 0.450  | 0.577  |
| <b>F<sup>b</sup></b> | <b>MP2</b>   | −0.193 | −0.159 | −0.210 | −0.169 | −0.224 | −0.176 | −0.224 | −0.178 |
|                      | <b>B3LYP</b> | −0.173 | −0.136 | −0.191 | −0.146 | −0.209 | −0.163 | −0.211 | −0.169 |
| FNgPF <sub>4</sub>   | Methods      | Ar     |        | Kr     |        | Xe     |        | Rn     |        |
|                      |              | Min    | TS     | Min    | TS     | Min    | TS     | Min    | TS     |
| <b>F<sup>a</sup></b> | <b>MP2</b>   | −0.782 | −0.912 | −0.699 | −0.898 | −0.638 | −0.855 | −0.652 | −0.853 |
|                      | <b>B3LYP</b> | −0.684 | −0.738 | −0.669 | −0.760 | −0.618 | −0.776 | −0.625 | −0.784 |
| <b>Ng</b>            | <b>MP2</b>   | 0.266  | 0.147  | 0.406  | 0.211  | 0.484  | 0.333  | 0.594  | 0.411  |
|                      | <b>B3LYP</b> | 0.248  | 0.098  | 0.343  | 0.119  | 0.445  | 0.261  | 0.555  | 0.339  |
| <b>P</b>             | <b>MP2</b>   | 1.376  | 1.332  | 1.220  | 1.278  | 1.134  | 1.142  | 1.017  | 1.102  |
|                      | <b>B3LYP</b> | 1.276  | 1.140  | 1.240  | 1.160  | 1.162  | 1.116  | 1.043  | 1.098  |
| <b>F<sup>b</sup></b> | <b>MP2</b>   | −0.184 | −0.119 | −0.203 | −0.122 | −0.218 | −0.127 | −0.210 | −0.137 |
|                      | <b>B3LYP</b> | −0.184 | −0.102 | −0.202 | −0.109 | −0.223 | −0.128 | −0.217 | −0.133 |

<sup>a</sup>It corresponds to the fluorine (F) atom that is bonded to the noble gas (Ng) atom.

<sup>b</sup>It represents the fluorine (F) atom that is bonded to the phosphorous (P) atom.

**Table S3. EDA-NOCV Results of FNgPF<sub>2</sub> and FNgPF<sub>4</sub> (Ng = Ar, Kr, Xe, and Rn) Molecules Considering F<sup>−</sup> as One Fragment and NgPF<sub>2</sub><sup>+</sup> or NgPF<sub>4</sub><sup>+</sup> as Another Fragment at the B3LYP-D3/TZ2P Level of Theory. All Energy Terms are Expressed in kcal mol<sup>−1</sup>.**

| Molecule           | $\Delta E^{\text{Pauli } a}$ | $\Delta E^{\text{elstat } a}$ | $\Delta E_{\text{T}^{\text{orb } a}}$ | $\Delta E_{\text{1}^{\text{orb } b}}$ | $\Delta E_{\text{2}^{\text{orb } b}}$ | $\Delta E_{\text{3}^{\text{orb } b}}$ | $\Delta E_{\text{4}^{\text{orb } b}}$ | $\Delta E_{\text{5}^{\text{orb } b}}$ | $\Delta E_{\text{res}^{\text{orb } b}}$ | $\Delta E^{\text{disp } a}$ | $\Delta E^{\text{int}}$ |
|--------------------|------------------------------|-------------------------------|---------------------------------------|---------------------------------------|---------------------------------------|---------------------------------------|---------------------------------------|---------------------------------------|-----------------------------------------|-----------------------------|-------------------------|
| FArPF <sub>2</sub> | 76.2                         | −145.6<br>(70.0)              | −62.3<br>(29.9)                       | −53.5<br>(85.9)                       | −2.5<br>(4.0)                         | −2.4<br>(3.9)                         | −1.7<br>(3.0)                         | −0.5<br>(0.8)                         | −1.7<br>(2.7)                           | −0.2<br>(0.1)               | −131.9                  |
| FKrPF <sub>2</sub> | 94.1                         | −161.8<br>(69.3)              | −71.5<br>(30.6)                       | −58.9<br>(82.4)                       | −3.7<br>(5.2)                         | −3.6<br>(5.0)                         | −2.6<br>(3.6)                         | −0.5<br>(0.7)                         | −2.2<br>(3.1)                           | −0.1<br>(0.0)               | −139.3                  |
| FXePF <sub>2</sub> | 116.4                        | −183.0<br>(69.2)              | −81.5<br>(30.8)                       | −64.7<br>(79.4)                       | −5.1<br>(6.3)                         | −5.0<br>(6.1)                         | −3.9<br>(4.8)                         | −0.7<br>(0.9)                         | −2.1<br>(2.6)                           | −0.1<br>(0.0)               | −148.2                  |
| FRnPF <sub>2</sub> | 110.0                        | −184.4<br>(70.7)              | −76.3<br>(29.3)                       | −60.0<br>(78.6)                       | −4.8<br>(6.3)                         | −4.7<br>(6.2)                         | −3.9<br>(5.1)                         | −0.6<br>(0.8)                         | −2.3<br>(3.0)                           | −0.1<br>(0.0)               | −150.8                  |
| FArPF <sub>4</sub> | 68.9                         | −145.0<br>(72.2)              | −55.5<br>(27.7)                       | −46.6<br>(84.0)                       | −2.3<br>(4.1)                         | −2.3<br>(4.1)                         | −1.6<br>(2.9)                         | ... <sup>c</sup>                      | −2.7<br>(4.9)                           | −0.2<br>(0.1)               | −131.8                  |
| FKrPF <sub>4</sub> | 94.2                         | −167.8<br>(70.2)              | −71.0<br>(29.7)                       | −57.9<br>(81.5)                       | −3.6<br>(5.1)                         | −3.6<br>(5.1)                         | −2.6<br>(3.7)                         | ... <sup>c</sup>                      | −3.3<br>(4.6)                           | −0.1<br>(0.0)               | −144.8                  |
| FXePF <sub>4</sub> | 119.3                        | −193.1<br>(69.6)              | −84.1<br>(30.3)                       | −66.6<br>(79.2)                       | −5.1<br>(6.1)                         | −5.1<br>(6.1)                         | −3.9<br>(4.6)                         | −0.9<br>(1.1)                         | −2.5<br>(3.0)                           | −0.1<br>(0.0)               | −158.0                  |
| FRnPF <sub>4</sub> | 112.6                        | −195.5<br>(71.2)              | −78.9<br>(28.7)                       | −61.8<br>(78.3)                       | −4.9<br>(6.2)                         | −4.9<br>(6.2)                         | −3.9<br>(4.9)                         | −0.9<br>(1.1)                         | −2.5<br>(3.2)                           | −0.1<br>(0.0)               | −162.0                  |

<sup>a</sup>The values within the parentheses are in percentage and show the contribution towards the total attractive interaction  $\Delta E^{\text{elstat}} + \Delta E_{\text{T}^{\text{orb}}} + \Delta E^{\text{disp}}$ .

<sup>b</sup>The values within parentheses are the percentage contribution towards the total orbital interaction  $\Delta E_{\text{T}^{\text{orb}}}$ .

<sup>c</sup>The corresponding value is below the cut-off value of ADF to be listed in the EDA-NOCV results.

**Table S4. EDA-NOCV Results of FNgPF<sub>2</sub> and FNgPF<sub>4</sub> (Ng = Ar, Kr, Xe, and Rn) Molecules Considering FNg as One Fragment and PF<sub>2</sub> or PF<sub>4</sub> as Another Fragment at the B3LYP-D3/TZ2P Level of Theory. All Energy Terms are Expressed in kcal mol<sup>-1</sup>.**

| Molecule           | $\Delta E^{\text{Pauli } a}$ | $\Delta E^{\text{elstat } a}$ | $\Delta E_{\text{T}}^{\text{orb } a}$ | $\Delta E_1^{\text{orb}}$           |                                    | $\Delta E_2^{\text{orb}}$           |                                    | $\Delta E_3^{\text{orb}}$           |                                    | $\Delta E_4^{\text{orb}}$           |                                    | $\Delta E_{\text{res}}^{\text{orb } b}$ | $\Delta E^{\text{disp } a}$ | $\Delta E^{\text{int}}$ |
|--------------------|------------------------------|-------------------------------|---------------------------------------|-------------------------------------|------------------------------------|-------------------------------------|------------------------------------|-------------------------------------|------------------------------------|-------------------------------------|------------------------------------|-----------------------------------------|-----------------------------|-------------------------|
|                    |                              |                               |                                       | $\Delta E_{\alpha}^{\text{orb } b}$ | $\Delta E_{\beta}^{\text{orb } b}$ | $\Delta E_{\alpha}^{\text{orb } b}$ | $\Delta E_{\beta}^{\text{orb } b}$ | $\Delta E_{\alpha}^{\text{orb } b}$ | $\Delta E_{\beta}^{\text{orb } b}$ | $\Delta E_{\alpha}^{\text{orb } b}$ | $\Delta E_{\beta}^{\text{orb } b}$ |                                         |                             |                         |
| FArPF <sub>2</sub> | 134.5                        | -63.4<br>(44.8)               | -77.2<br>(54.6)                       | -56.4<br>(73.1)                     | -8.7<br>(11.3)                     | -2.5<br>(3.2)                       | -1.5<br>(1.9)                      | -1.5<br>(1.9)                       | -1.3<br>(1.7)                      | -1.7<br>(2.2)                       | -1.6<br>(2.1)                      | -2.0<br>(2.6)                           | -0.9<br>(0.6)               | -7.0                    |
| FKrPF <sub>2</sub> | 127.4                        | -66.2<br>(46.2)               | -76.4<br>(53.3)                       | -49.5<br>(64.8)                     | -15.4<br>(20.2)                    | -2.0<br>(2.6)                       | -1.4<br>(1.8)                      | -1.6<br>(2.1)                       | -1.5<br>(2.0)                      | -1.5<br>(2.0)                       | -1.4<br>(1.8)                      | -2.1<br>(2.7)                           | -0.8<br>(0.6)               | -16.0                   |
| FXePF <sub>2</sub> | 123.7                        | -68.9<br>(47.2)               | -76.2<br>(52.2)                       | -41.7<br>(54.7)                     | -24.0<br>(31.5)                    | -1.8<br>(2.4)                       | -1.4<br>(1.8)                      | -1.6<br>(2.1)                       | -1.4<br>(1.8)                      | -1.3<br>(1.7)                       | -1.3<br>(1.7)                      | -1.7<br>(2.2)                           | -0.9<br>(0.6)               | -22.2                   |
| FRnPF <sub>2</sub> | 113.8                        | -67.1<br>(48.9)               | -69.2<br>(50.4)                       | -34.4<br>(49.7)                     | -25.7<br>(37.1)                    | -1.4<br>(2.0)                       | -1.3<br>(1.9)                      | -1.5<br>(2.2)                       | -1.3<br>(1.9)                      | ... <sup>c</sup>                    | -1.1<br>(1.6)                      | -2.5<br>(3.6)                           | -1.0<br>(0.7)               | -23.5                   |
| FArPF <sub>4</sub> | 148.2                        | -71.5<br>(44.0)               | -89.8<br>(55.3)                       | -67.4<br>(75.1)                     | -10.8<br>(12.0)                    | -2.9<br>(3.2)                       | -1.1<br>(1.2)                      | -1.3<br>(1.4)                       | -1.1<br>(1.2)                      | -1.3<br>(1.4)                       | -0.8<br>(0.9)                      | -3.1<br>(3.5)                           | -1.2<br>(0.7)               | -14.3                   |
| FKrPF <sub>4</sub> | 132.5                        | -70.0<br>(45.6)               | -82.4<br>(53.7)                       | -52.8<br>(64.1)                     | -18.8<br>(22.8)                    | -2.1<br>(2.5)                       | -1.2<br>(1.5)                      | -1.4<br>(1.7)                       | -1.2<br>(1.5)                      | -1.4<br>(1.7)                       | ... <sup>c</sup>                   | -3.5<br>(4.2)                           | -1.0<br>(0.7)               | -21.0                   |
| FXePF <sub>4</sub> | 120.7                        | -68.2<br>(46.3)               | -78.0<br>(52.9)                       | -40.1<br>(51.4)                     | -28.9<br>(37.1)                    | -1.6<br>(2.1)                       | -1.1<br>(1.4)                      | -1.2<br>(1.5)                       | -1.1<br>(1.4)                      | -1.2<br>(1.5)                       | ... <sup>c</sup>                   | -2.8<br>(3.6)                           | -1.2<br>(0.8)               | -26.7                   |
| FRnPF <sub>4</sub> | 108.8                        | -65.2<br>(47.6)               | -70.4<br>(51.4)                       | -31.6<br>(44.9)                     | -31.3<br>(44.5)                    | -1.3<br>(1.8)                       | -1.0<br>(1.4)                      | -1.0<br>(1.4)                       | -1.0<br>(1.4)                      | -1.0<br>(1.4)                       | ... <sup>c</sup>                   | -2.2<br>(3.1)                           | -1.4<br>(1.0)               | -28.1                   |

<sup>a</sup>The values within the parentheses are in percentage and show the contribution towards the total attractive interaction  $\Delta E^{\text{elstat}} + \Delta E_{\text{T}}^{\text{orb}} + \Delta E^{\text{disp}}$ .

<sup>b</sup>The values within parentheses are the percentage contribution towards the total orbital interaction  $\Delta E_{\text{T}}^{\text{orb}}$ ;

<sup>c</sup>The corresponding value is below the cut-off value of ADF to be listed in the EDA-NOCV results.

**Table S5. EDA-NOCV Results of FNgPF<sub>2</sub> and FNgPF<sub>4</sub> (Ng = Ar, Kr, Xe, and Rn) Molecules Considering FNg<sup>−</sup> as One Fragment and PF<sub>2</sub><sup>+</sup> or PF<sub>4</sub><sup>+</sup> as Another Fragment at the B3LYP-D3/TZ2P Level of Theory. All Energy Terms are Expressed in kcal mol<sup>−1</sup>.**

| Molecule           | $\Delta E^{\text{Pauli } a}$ | $\Delta E^{\text{elstat } a}$ | $\Delta E_{\text{T}}^{\text{orb } a}$ | $\Delta E_{\text{i}}^{\text{orb } b}$ |               |               |               |               |               |               |               |                  |                  |                  |                  |                         | $\Delta E^{\text{disp } a}$ | $\Delta E^{\text{int}}$ |
|--------------------|------------------------------|-------------------------------|---------------------------------------|---------------------------------------|---------------|---------------|---------------|---------------|---------------|---------------|---------------|------------------|------------------|------------------|------------------|-------------------------|-----------------------------|-------------------------|
|                    |                              |                               |                                       | $\Delta E_1$                          | $\Delta E_2$  | $\Delta E_3$  | $\Delta E_4$  | $\Delta E_5$  | $\Delta E_6$  | $\Delta E_7$  | $\Delta E_8$  | $\Delta E_9$     | $\Delta E_{10}$  | $\Delta E_{11}$  | $\Delta E_{12}$  | $\Delta E_{\text{res}}$ |                             |                         |
| FArPF <sub>2</sub> | 97.3                         | −136.9<br>(53.8)              | −116.6<br>(45.8)                      | −99.0<br>(84.9)                       | −5.3<br>(4.5) | −4.9<br>(4.2) | −2.5<br>(2.1) | −2.8<br>(2.4) | −0.2<br>(0.2) | −0.3<br>(0.3) | −0.6<br>(0.5) | ... <sup>c</sup> | ... <sup>c</sup> | ... <sup>c</sup> | ... <sup>c</sup> | −1.0<br>(0.9)           | −0.9<br>(0.4)               | −157.2                  |
| FKrPF <sub>2</sub> | 107.8                        | −149.2<br>(53.8)              | −127.4<br>(45.9)                      | −110.8<br>(87.0)                      | −5.1<br>(4.0) | −5.0<br>(3.9) | −1.0<br>(0.8) | −3.1<br>(2.4) | −0.2<br>(0.2) | −0.2<br>(0.2) | −0.6<br>(0.5) | −0.2<br>(0.2)    | ... <sup>c</sup> | ... <sup>c</sup> | ... <sup>c</sup> | −1.2<br>(0.9)           | −0.8<br>(0.3)               | −169.6                  |
| FXePF <sub>2</sub> | 128.1                        | −162.6<br>(52.7)              | −145.3<br>(47.1)                      | −129.3<br>(89.0)                      | −5.4<br>(3.7) | −5.1<br>(3.5) | −2.2<br>(1.5) | −1.3<br>(0.9) | −0.5<br>(0.3) | −0.2<br>(0.1) | −0.2<br>(0.1) | −0.3<br>(0.2)    | −0.1<br>(0.1)    | −0.2<br>(0.1)    | ... <sup>c</sup> | −0.5<br>(0.3)           | −0.9<br>(0.3)               | −180.6                  |
| FRnPF <sub>2</sub> | 132.3                        | −165.5<br>(52.5)              | −148.7<br>(47.2)                      | −134.3<br>(90.3)                      | −5.1<br>(3.4) | −4.7<br>(3.2) | −1.8<br>(1.2) | −1.1<br>(0.7) | −0.4<br>(0.3) | −0.2<br>(0.1) | −0.2<br>(0.1) | −0.2<br>(0.1)    | −0.1<br>(0.1)    | −0.1<br>(0.1)    | ... <sup>c</sup> | −0.5<br>(0.3)           | −1.0<br>(0.3)               | −182.9                  |
| FArPF <sub>4</sub> | 94.8                         | −142.2<br>(55.9)              | −110.9<br>(43.6)                      | −93.2<br>(84.0)                       | −3.7<br>(3.3) | −4.4<br>(4.0) | −4.4<br>(4.0) | −2.0<br>(1.8) | −0.3<br>(0.3) | −0.3<br>(0.3) | −0.5<br>(0.5) | −0.4<br>(0.4)    | ... <sup>c</sup> | ... <sup>c</sup> | ... <sup>c</sup> | −1.7<br>(1.5)           | −1.2<br>(0.5)               | −159.5                  |
| FKrPF <sub>4</sub> | 105.8                        | −159.7<br>(54.8)              | −130.4<br>(44.8)                      | −113.2<br>(86.8)                      | −4.2<br>(3.2) | −4.2<br>(3.2) | −3.0<br>(2.3) | −1.7<br>(1.3) | −0.2<br>(0.2) | −0.2<br>(0.2) | −0.4<br>(0.3) | −0.5<br>(0.4)    | −0.5<br>(0.4)    | ... <sup>c</sup> | ... <sup>c</sup> | −2.3<br>(1.8)           | −1.1<br>(0.4)               | −185.3                  |
| FXePF <sub>4</sub> | 124.7                        | −176.3<br>(53.3)              | −153.5<br>(46.4)                      | −137.5<br>(89.6)                      | −4.2<br>(2.7) | −4.2<br>(2.7) | −2.4<br>(1.6) | −1.4<br>(0.9) | −0.3<br>(0.2) | −0.3<br>(0.2) | −0.4<br>(0.3) | −0.5<br>(0.3)    | −0.5<br>(0.3)    | −0.3<br>(0.2)    | −0.3<br>(0.2)    | −1.2<br>(0.8)           | −1.2<br>(0.4)               | −206.2                  |
| FRnPF <sub>4</sub> | 129.4                        | −181.1<br>(53.1)              | −158.8<br>(46.5)                      | −144.6<br>(91.1)                      | −3.8<br>(2.4) | −3.8<br>(2.4) | −2.3<br>(1.4) | −1.0<br>(0.6) | −0.3<br>(0.2) | −0.3<br>(0.2) | −0.4<br>(0.3) | −0.4<br>(0.3)    | −0.4<br>(0.3)    | −0.3<br>(0.2)    | −0.3<br>(0.2)    | −0.9<br>(0.6)           | −1.4<br>(0.4)               | −211.8                  |

<sup>a</sup>The values within the parentheses are in percentage and show the contribution towards the total attractive interaction  $\Delta E^{\text{elstat}} + \Delta E_{\text{T}}^{\text{orb}} + \Delta E^{\text{disp}}$ .

<sup>b</sup>The values within parentheses are the percentage contribution towards the total orbital interaction  $\Delta E_{\text{T}}^{\text{orb}}$ .

<sup>c</sup>The corresponding value is below the cut-off value of ADF to be listed in the EDA-NOCV results.

**Table S6. EDA-NOCV Results of FNgPF<sub>2</sub> and FNgPF<sub>4</sub> (Ng = Ar, Kr, Xe, and Rn) Molecules Considering FNg<sup>+</sup> as One Fragment and PF<sub>2</sub><sup>−</sup> or PF<sub>4</sub><sup>−</sup> as Another Fragment at the B3LYP-D3/TZ2P Level of Theory. All Energy Terms are Expressed in kcal mol<sup>−1</sup>.**

| Molecule           | $\Delta E^{\text{Pauli } a}$ | $\Delta E^{\text{elstat } a}$ | $\Delta E_{\text{T}}^{\text{orb } a}$ | $\Delta E_{\text{i}}^{\text{orb } b}$ |               |               |               |               |               |               |               |               |                 |                  |                  |                         | $\Delta E^{\text{disp } a}$ | $\Delta E^{\text{int}}$ |
|--------------------|------------------------------|-------------------------------|---------------------------------------|---------------------------------------|---------------|---------------|---------------|---------------|---------------|---------------|---------------|---------------|-----------------|------------------|------------------|-------------------------|-----------------------------|-------------------------|
|                    |                              |                               |                                       | $\Delta E_1$                          | $\Delta E_2$  | $\Delta E_3$  | $\Delta E_4$  | $\Delta E_5$  | $\Delta E_6$  | $\Delta E_7$  | $\Delta E_8$  | $\Delta E_9$  | $\Delta E_{10}$ | $\Delta E_{11}$  | $\Delta E_{12}$  | $\Delta E_{\text{res}}$ |                             |                         |
| FArPF <sub>2</sub> | 231.1                        | −254.0<br>(45.1)              | −308.7<br>(54.8)                      | −297.3<br>(96.3)                      | −2.9<br>(0.9) | −0.2<br>(0.1) | −1.0<br>(0.3) | −2.0<br>(0.6) | −1.3<br>(0.4) | −1.4<br>(0.5) | −0.3<br>(0.1) | −0.4<br>(0.1) | −0.3<br>(0.1)   | −0.3<br>(0.1)    | −0.3<br>(0.1)    | −1.0<br>(0.3)           | −0.9<br>(0.2)               | −332.5                  |
| FKrPF <sub>2</sub> | 226.4                        | −268.1<br>(50.4)              | −262.8<br>(49.4)                      | −251.3<br>(95.6)                      | −2.9<br>(1.1) | −0.7<br>(0.3) | −1.1<br>(0.4) | −1.2<br>(0.5) | −0.9<br>(0.3) | −1.6<br>(0.6) | −0.5<br>(0.2) | −0.5<br>(0.2) | −0.2<br>(0.1)   | −0.3<br>(0.1)    | −0.3<br>(0.1)    | −1.3<br>(0.5)           | −0.8<br>(0.2)               | −305.4                  |
| FXePF <sub>2</sub> | 223.9                        | −278.5<br>(56.3)              | −215.7<br>(43.6)                      | −204.0<br>(94.6)                      | −1.0<br>(0.5) | −3.2<br>(1.5) | −1.1<br>(0.5) | −0.9<br>(0.4) | −0.7<br>(0.3) | −1.7<br>(0.8) | −0.6<br>(0.3) | −0.5<br>(0.2) | −0.1<br>(0.0)   | −0.3<br>(0.1)    | −0.3<br>(0.1)    | −1.3<br>(0.6)           | −0.9<br>(0.2)               | −271.2                  |
| FRnPF <sub>2</sub> | 208.4                        | −280.4<br>(60.0)              | −185.9<br>(39.8)                      | −174.6<br>(93.9)                      | −1.1<br>(0.6) | −3.2<br>(1.7) | −1.1<br>(0.6) | −0.8<br>(0.4) | −0.7<br>(0.4) | −1.5<br>(0.8) | −0.6<br>(0.3) | −0.5<br>(0.3) | −0.2<br>(0.1)   | ... <sup>c</sup> | ... <sup>c</sup> | −1.6<br>(0.9)           | −1.0<br>(0.2)               | −259.0                  |
| FArPF <sub>4</sub> | 226.0                        | −236.9<br>(41.6)              | −331.1<br>(58.2)                      | −316.7<br>(95.7)                      | −0.2<br>(0.1) | −0.2<br>(0.1) | −3.5<br>(1.1) | −1.7<br>(0.5) | −1.7<br>(0.5) | −0.6<br>(0.2) | −0.4<br>(0.1) | −0.8<br>(0.2) | −0.8<br>(0.2)   | −0.7<br>(0.2)    | −0.6<br>(0.2)    | −3.2<br>(1.0)           | −1.2<br>(0.2)               | −343.2                  |
| FKrPF <sub>4</sub> | 218.3                        | −250.9<br>(48.1)              | −269.3<br>(51.7)                      | −254.6<br>(94.5)                      | −0.9<br>(0.3) | −0.9<br>(0.3) | −3.0<br>(1.1) | −1.0<br>(0.4) | −1.0<br>(0.4) | −0.6<br>(0.2) | −0.9<br>(0.3) | −0.9<br>(0.3) | −0.7<br>(0.3)   | −0.6<br>(0.2)    | −0.6<br>(0.2)    | −3.6<br>(1.3)           | −1.1<br>(0.2)               | −302.9                  |
| FXePF <sub>4</sub> | 207.8                        | −255.7<br>(54.6)              | −211.5<br>(45.2)                      | −197.7<br>(93.5)                      | −1.2<br>(0.6) | −1.2<br>(0.6) | −2.6<br>(1.2) | −0.7<br>(0.3) | −0.7<br>(0.3) | −0.7<br>(0.3) | −1.0<br>(0.5) | −1.0<br>(0.5) | −0.6<br>(0.3)   | −0.5<br>(0.2)    | −0.5<br>(0.2)    | −3.1<br>(1.5)           | −1.2<br>(0.3)               | −260.6                  |
| FRnPF <sub>4</sub> | 188.6                        | −255.0<br>(58.6)              | −178.5<br>(41.0)                      | −165.6<br>(92.8)                      | −1.1<br>(0.6) | −1.1<br>(0.6) | −2.3<br>(1.3) | −0.7<br>(0.4) | −0.7<br>(0.4) | −1.0<br>(0.6) | −1.0<br>(0.6) | −0.7<br>(0.4) | −0.6<br>(0.3)   | −0.5<br>(0.3)    | −0.5<br>(0.3)    | −2.7<br>(1.5)           | −1.4<br>(0.3)               | −246.3                  |

<sup>a</sup>The values within the parentheses are in percentage and show the contribution towards the total attractive interaction  $\Delta E^{\text{elstat}} + \Delta E_{\text{T}}^{\text{orb}} + \Delta E^{\text{disp}}$ .

<sup>b</sup>The values within parentheses are the percentage contribution towards the total orbital interaction  $\Delta E_{\text{T}}^{\text{orb}}$ .

<sup>c</sup>The corresponding value is below the cut-off value of ADF to be listed in the EDA-NOCV results.
